# Supplementary material for: Non-mutagenic Ru(ii) complexes: cytotoxicity, topoisomerase IB inhibition, DNA and HSA binding
Source: Royal Society of Chemistry journal article supplement (doi:10.1039/c9dt01905g), 2019-01-01
Supplement: c9dt01905g1.pdf [file c9dt01905g1.pdf]

## Supplementary material

### Non-mutagenic Ru(II) complexes: cytotoxicity, Topoisomerase IB inhibition, DNA and HSA binding

Monize M. da Silva<sup>a,c\*</sup>, Mariana S. de Camargo<sup>a</sup>, Rodrigo S. Correa<sup>b</sup>, Silvia Castelli<sup>c</sup>, Rone A. De Grandis<sup>d</sup>, Jessica E. Takarada<sup>c</sup>, Eliana A. Varanda<sup>d</sup>, Eduardo E. Castelano<sup>e</sup>, Victor M. Deflon<sup>f</sup>, Marcia R. Cominetti<sup>g</sup>, Alessandro Desideri<sup>c</sup>, Alzir A. Batista<sup>a\*</sup>

<sup>a</sup>Departamento de Química, Universidade Federal de São Carlos, CP 676, CEP 13565-905, São Carlos, SP, Brazil. <sup>b</sup>Departamento de Química, Universidade Federal de Ouro Preto, CEP 35400-000, Ouro Preto, MG, Brazil. <sup>c</sup>Dipartimento di Biologia, Università Tor Vergata di Roma, 00133 Rome, Italy. <sup>d</sup>Departamento de Ciências Biológicas, Faculdade de Ciências Farmacêuticas, UNESP, CEP 14801-902, Araraquara, SP, Brazil. <sup>e</sup>Instituto de Física, Universidade de São Paulo, CP 369, CEP 13560-970, São Carlos, SP, Brazil. <sup>f</sup>Instituto de Química de São Carlos, Universidade de São Paulo, CP 780, CEP 13560-970, São Carlos, SP, Brazil. <sup>g</sup> Departamento de Gerontologia, Universidade Federal de São Carlos, CP 676, CEP 13565-905, São Carlos (SP), Brazil.

\*Corresponding authors: Tel.: +55 16 33518285; fax: +55 16 33518350.

E-mail addresses: monize\_martins@yahoo.com.br (M. M. da Silva); daab@ufscar.br (A.A. Batista)

Table 1S. Crystal data and structure refinement parameters obtained for the complexes 1, 3 and 5.

|                                                                | 1                                                                                                 | 3                                                                                  | 5                                                                                                      |
|----------------------------------------------------------------|---------------------------------------------------------------------------------------------------|------------------------------------------------------------------------------------|--------------------------------------------------------------------------------------------------------|
| Empirical formula                                              | [RuC <sub>41</sub> H <sub>40</sub> N <sub>3</sub> P <sub>2</sub> S <sub>2</sub> ]ClO <sub>4</sub> | [RuC <sub>42</sub> H <sub>41</sub> N <sub>6</sub> P <sub>2</sub> S]PF <sub>6</sub> | [RuC <sub>46</sub> H <sub>41</sub> N <sub>4</sub> OP <sub>2</sub> S]PF <sub>6</sub> ·2H <sub>2</sub> O |
| Formula weight                                                 | 901.34                                                                                            | 969.85                                                                             | 1041.90                                                                                                |
| Crystal system                                                 | Orthorhombic                                                                                      | Orthorhombic                                                                       | Monoclinic                                                                                             |
| Space group                                                    | Pbca                                                                                              | Pbca                                                                               | P2 <sub>1</sub> /c                                                                                     |
| Unit cell dimensions                                           |                                                                                                   |                                                                                    |                                                                                                        |
| a (Å)                                                          | 18.669(5)                                                                                         | 18.3678(8)                                                                         | 10.0164(4)                                                                                             |
| b (Å)                                                          | 19.702(5)                                                                                         | 20.3902(5)                                                                         | 31.8519(14)                                                                                            |
| c (Å)                                                          | 21.195(5)                                                                                         | 22.2064(9)                                                                         | 14.9197(7)                                                                                             |
| β (°)                                                          | 90                                                                                                | 90                                                                                 | 100.055                                                                                                |
| Volume (Å <sup>3</sup> )                                       | 7796(3)                                                                                           | 8316.8(5)                                                                          | 4686.9(4)                                                                                              |
| Z                                                              | 8                                                                                                 | 8                                                                                  | 4                                                                                                      |
| Density calculated (Mg/m <sup>3</sup> )                        | 1.536                                                                                             | 1.549                                                                              | 1.477                                                                                                  |
| μ (mm <sup>-1</sup> )                                          | 0.707                                                                                             | 0.610                                                                              | 0.550                                                                                                  |
| F(000)                                                         | 3696                                                                                              | 3952                                                                               | 2128                                                                                                   |
| Crystal size (mm <sup>3</sup> )                                | 0.184 x 0.056 x 0.051                                                                             | 0.105 x 0.092 x 0.085                                                              | 0.090 x 0.040 x 0.040                                                                                  |
| θ range (°)                                                    | 3.006 to 25.682                                                                                   | 2.93 to 25.59                                                                      | 1.279 to 26.381                                                                                        |
| Index ranges                                                   | -20 ≤ h ≤ 22, -24 ≤ k ≤ 21, -25 ≤ l ≤ 23                                                          | -18 ≤ h ≤ 22, -24 ≤ k ≤ 24, -26 ≤ l ≤ 24                                           | -11 ≤ h ≤ 12, -39 ≤ k ≤ 39, -18 ≤ l ≤ 18                                                               |
| Reflections collected                                          | 35026                                                                                             | 26718                                                                              | 76595                                                                                                  |
| Independent reflections                                        | 7375 [R(int) = 0.0737]                                                                            | 7787 [R(int) = 0.0875]                                                             | 9602 [R(int) = 0.1752]                                                                                 |
| Completeness to θ (%)                                          | 99.7                                                                                              | 99.6                                                                               | 100                                                                                                    |
| Refinement method                                              | Full-matrix least-squares on F <sup>2</sup>                                                       | Full-matrix least-squares on F <sup>2</sup>                                        | Full-matrix least-squares on F <sup>2</sup>                                                            |
| Data / restraints / parameters                                 | 7375 / 0 / 487                                                                                    | 7787 / 0 / 484                                                                     | 9602 / 0 / 566                                                                                         |
| Goodness-of-fit on F <sup>2</sup>                              | 1.022                                                                                             | 1.015                                                                              | 0.931                                                                                                  |
| Final R indices [I > 2σ(I)]                                    | R1 = 0.0454, wR2 = 0.1059                                                                         | R1 = 0.0542, wR2 = 0.1222                                                          | R1 = 0.0604, wR2 = 0.1657                                                                              |
| R indices (all data)                                           | R1 = 0.0766, wR2 = 0.1170                                                                         | R1 = 0.0997, wR2 = 0.1436                                                          | R1 = 0.1200, wR2 = 0.1870                                                                              |
| Δρ <sub>max</sub> and Δρ <sub>min</sub> . (e.Å <sup>-3</sup> ) | 0.621 and -0.457                                                                                  | 0.507 and -0.538                                                                   | 1.52 d -0.908                                                                                          |

Table 2S. Bond and angle lengths (Å, °) for the complexes 1, 3 and 5.

|                  |            |                  |            |
|------------------|------------|------------------|------------|
| <b>Complex 1</b> |            | N(11)-Ru-P(2)    | 92.16(10)  |
| Ru(1)-N(2)       | 2.116(3)   | N(1)-Ru-P(2)     | 157.82(11) |
| Ru(1)-N(3)       | 2.139(3)   | N(21)-Ru-P(1)    | 100.08(11) |
| Ru(1)-N(1)       | 2.151(3)   | N(11)-Ru-P(1)    | 172.84(10) |
| Ru(1)-P(1)       | 2.3095(11) | N(1)-Ru-P(1)     | 90.87(10)  |
| Ru(1)-P(2)       | 2.3296(11) | P(2)-Ru-P(1)     | 94.97(5)   |
| Ru(1)-S(1)       | 2.4375(11) | N(21)-Ru-S(1)    | 159.53(10) |
| N(2)-Ru(1)-N(3)  | 77.28(12)  | N(11)-Ru-S(1)    | 91.53(10)  |
| N(2)-Ru(1)-N(1)  | 90.60(13)  | N(1)-Ru-S(1)     | 67.51(11)  |
| N(3)-Ru(1)-N(1)  | 82.96(12)  | P(2)-Ru-S(1)     | 91.19(5)   |
| N(2)-Ru(1)-P(1)  | 107.35(9)  | P(1)-Ru-S(1)     | 88.94(4)   |
| N(3)-Ru(1)-P(1)  | 91.70(9)   | <b>Complex 5</b> |            |
| N(1)-Ru(1)-P(1)  | 159.72(10) | Ru(1)-N(3)       | 2.095(4)   |
| N(2)-Ru(1)-P(2)  | 100.43(9)  | Ru(1)-N(4)       | 2.134(4)   |
| N(3)-Ru(1)-P(2)  | 173.83(9)  | Ru(1)-N(2)       | 2.157(5)   |
| N(1)-Ru(1)-P(2)  | 91.37(9)   | Ru(1)-P(1)       | 2.2938(16) |
| P(1)-Ru(1)-P(2)  | 94.46(4)   | Ru(1)-P(2)       | 2.3372(15) |
| N(2)-Ru(1)-S(1)  | 156.34(9)  | Ru(1)-S(1)       | 2.4346(16) |
| N(3)-Ru(1)-S(1)  | 90.93(9)   | N(3)-Ru(1)-N(4)  | 77.33(18)  |
| N(1)-Ru(1)-S(1)  | 67.39(10)  | N(3)-Ru(1)-N(2)  | 97.78(17)  |
| P(1)-Ru(1)-S(1)  | 93.26(4)   | N(4)-Ru(1)-N(2)  | 83.10(17)  |
| P(2)-Ru(1)-S(1)  | 89.13(4)   | N(3)-Ru(1)-P(1)  | 89.64(13)  |
| <b>Complex 3</b> |            | N(4)-Ru(1)-P(1)  | 92.17(13)  |
| Ru-N(21)         | 2.121(4)   | N(2)-Ru(1)-P(1)  | 170.08(12) |
| Ru-N(11)         | 2.134(4)   | N(3)-Ru(1)-P(2)  | 101.43(13) |
| Ru-N(1)          | 2.184(4)   | N(4)-Ru(1)-P(2)  | 174.01(13) |
| Ru-P(1)          | 2.3038(13) | N(2)-Ru(1)-P(2)  | 91.30(12)  |
| Ru-P(2)          | 2.3360(13) | P(1)-Ru(1)-P(2)  | 93.68(6)   |
| Ru-S(1)          | 2.3939(12) | N(3)-Ru(1)-S(1)  | 161.62(13) |
| N(21)-Ru-N(11)   | 77.28(14)  | N(4)-Ru(1)-S(1)  | 89.85(14)  |
| N(21)-Ru-N(1)    | 93.82(14)  | N(2)-Ru(1)-S(1)  | 67.27(12)  |
| N(11)-Ru-N(1)    | 82.72(13)  | P(1)-Ru(1)-S(1)  | 104.14(6)  |
| N(21)-Ru-P(2)    | 106.13(10) | P(2)-Ru(1)-S(1)  | 89.94(6)   |

**Table 3S.** Mutagenic activity expressed as the mean and standard deviation of the number of revertants and mutagenic index (MI) (in brackets) in strains TA98, TA100, TA102 and TA97a exposed to compounds 1, 2 and 3 at various doses, with (+S9) or without (-S9) metabolic activation.

| Treatments          |                       | Number of revertants (M ± SD)/plate and MI |                        |                        |                        |                        |                        |                          |  |
|---------------------|-----------------------|--------------------------------------------|------------------------|------------------------|------------------------|------------------------|------------------------|--------------------------|--|
| µg/per plate<br>(1) | TA 98                 |                                            | TA 100                 |                        | TA 102                 |                        | TA 97a                 |                          |  |
|                     | - S9                  | + S9                                       | - S9                   | + S9                   | - S9                   | + S9                   | - S9                   | + S9                     |  |
| 0.00 <sup>a</sup>   | 17 ± 3                | 32 ± 3                                     | 111 ± 7                | 133 ± 7                | 343 ± 20               | 336 ± 20               | 106 ± 13               | 149 ± 8                  |  |
| 0.78                | 16 ± 5 (0,9)          | 35 ± 4 (1,0)                               | 113 ± 10 (1,0)         | 136 ± 11 (1,0)         | 338 ± 21 (1,0)         | 341 ± 17 (1,0)         | 94 ± 11 (0,9)          | 141 ± 11 (0,9)           |  |
| 1.56                | 15 ± 4 (0,9)          | 36 ± 2 (1,1)                               | 102 ± 9 (0,9)          | 131 ± 10 (0,9)         | 325 ± 19 (0,9)         | 329 ± 19 (1,0)         | 88 ± 8 (0,8)           | 137 ± 15 (1,0)           |  |
| 3.12                | 17 ± 4 (1,0)          | 36 ± 5 (1,1)                               | 100 ± 8 (0,9)          | 132 ± 9 (1,0)          | 321 ± 27 (0,9)         | 338 ± 24 (1,0)         | 90 ± 7 (0,8)           | 140 ± 11 (1,0)           |  |
| 6.25                | 18 ± 3 (1,0)          | 32 ± 3 (1,0)                               | 98 ± 11 (0,9)          | 126 ± 14 (0,9)         | 317 ± 29 (0,9)         | 347 ± 31 (1,0)         | 91 ± 10 (0,8)          | 136 ± 16 (1,1)           |  |
| 9.37                | 15 ± 5 (0,9)          | 34 ± 4 (1,0)                               | 94 ± 7 (0,8)           | 119 ± 12 (0,9)         | 319 ± 28 (0,9)         | 327 ± 29 (1,0)         | 85 ± 9 (0,8)           | 122 ± 21 (1,1)           |  |
| C +                 | 830 ± 37 <sup>b</sup> | 1227 ± 89 <sup>c</sup>                     | 1001 ± 48 <sup>c</sup> | 1340 ± 73 <sup>c</sup> | 1207 ± 44 <sup>d</sup> | 1411 ± 41 <sup>f</sup> | 1663 ± 58 <sup>b</sup> | 1012 ± 92 <sup>e</sup>   |  |
| (2)                 |                       |                                            |                        |                        |                        |                        |                        |                          |  |
| 0.00 <sup>a</sup>   | 18 ± 2                | 23 ± 4                                     | 102 ± 9                | 144 ± 10               | 344 ± 16               | 321 ± 17               | 129 ± 10               | 133 ± 14                 |  |
| 0.78                | 17 ± 4 (0,9)          | 22 ± 3 (0,9)                               | 105 ± 5 (1,0)          | 141 ± 15 (0,9)         | 347 ± 5 (1,0)          | 332 ± 18 (1,0)         | 120 ± 17 (0,9)         | 145 ± 10 (1,0)           |  |
| 1.56                | 21 ± 3 (1,1)          | 24 ± 2 (1,1)                               | 109 ± 7 (1,0)          | 137 ± 9 (0,9)          | 330 ± 15 (0,9)         | 338 ± 9 (1,0)          | 110 ± 18 (0,8)         | 147 ± 12 (1,1)           |  |
| 3.12                | 19 ± 3 (1,0)          | 21 ± 5 (0,8)                               | 99 ± 9 (1,0)           | 131 ± 13 (0,9)         | 318 ± 19 (0,9)         | 353 ± 21 (1,1)         | 109 ± 13 (0,8)         | 139 ± 9 (1,0)            |  |
| 6.25                | 20 ± 2 (1,1)          | 22 ± 5 (1,0)                               | 101 ± 9 (1,0)          | 128 ± 11 (0,9)         | 303 ± 22 (0,9)         | 342 ± 27 (1,0)         | 103 ± 16 (0,8)         | 148 ± 4 (1,1)            |  |
| 9.37                | 19 ± 3 (1,0)          | 20 ± 4 (0,8)                               | 90 ± 10 (0,9)          | 137 ± 10 (0,9)         | 306 ± 21 (0,9)         | 335 ± 24 (1,0)         | 106 ± 19 (0,8)         | 138 ± 11 (1,0)           |  |
| C +                 | 913 ± 47 <sup>b</sup> | 2216 ± 88 <sup>c</sup>                     | 1613 ± 49 <sup>c</sup> | 1761 ± 82 <sup>e</sup> | 1255 ± 56 <sup>d</sup> | 1308 ± 64 <sup>f</sup> | 1032 ± 93 <sup>b</sup> | 17083 ± 110 <sup>e</sup> |  |
| (3)                 |                       |                                            |                        |                        |                        |                        |                        |                          |  |
| 0.00 <sup>a</sup>   | 22 ± 3                | 25 ± 3                                     | 109 ± 8                | 139 ± 7                | 349 ± 20               | 327 ± 18               | 99 ± 12                | 129 ± 11                 |  |
| 0.78                | 19 ± 3 (0,8)          | 21 ± 2 (0,8)                               | 117 ± 11 (1,0)         | 144 ± 12 (1,0)         | 353 ± 21 (1,0)         | 321 ± 16 (1,0)         | 95 ± 7 (0,9)           | 141 ± 9 (1,0)            |  |
| 1.56                | 20 ± 2 (0,9)          | 22 ± 3 (0,9)                               | 107 ± 9 (0,9)          | 136 ± 7 (0,9)          | 341 ± 19 (1,0)         | 336 ± 11 (1,0)         | 88 ± 9 (0,9)           | 146 ± 13 (1,1)           |  |
| 3.12                | 20 ± 4 (0,9)          | 24 ± 4 (0,9)                               | 103 ± 7 (0,9)          | 134 ± 11 (0,9)         | 321 ± 21 (0,9)         | 346 ± 19 (1,0)         | 96 ± 5 (0,9)           | 133 ± 8 (1,0)            |  |
| 6.25                | 21 ± 2 (0,9)          | 27 ± 6 (1,1)                               | 98 ± 10 (0,9)          | 127 ± 10 (0,9)         | 307 ± 25 (0,9)         | 339 ± 25 (1,0)         | 90 ± 7 (0,9)           | 145 ± 7 (1,1)            |  |
| 9.37                | 18 ± 4 (0,8)          | 22 ± 3 (0,9)                               | 107 ± 8 (0,8)          | 132 ± 11 (0,9)         | 310 ± 27 (0,9)         | 331 ± 22 (1,0)         | 83 ± 11 (0,8)          | 139 ± 10 (1,0)           |  |
| C +                 | 953 ± 44 <sup>b</sup> | 2187 ± 81 <sup>c</sup>                     | 1201 ± 51 <sup>c</sup> | 1801 ± 75 <sup>e</sup> | 1293 ± 39 <sup>d</sup> | 1327 ± 60 <sup>f</sup> | 1451 ± 61 <sup>b</sup> | 1712 ± 91 <sup>e</sup>   |  |

<sup>a</sup> Negative control: dimethylsulfoxide (DMSO) – 100 µL per plate; C+ = Positive control. <sup>b</sup> 4-Nitro-o-phenylenediamine (NOPD) – 10.0 mg per plate – positive control in the absence of S9 for TA98 and TA97a. <sup>c</sup> Sodium azide (1.25 mg per plate) – positive control in the absence of S9 for TA100. <sup>d</sup> Mitomycin (0.5 mg per plate) – positive control in the absence of S9 for TA102. <sup>e</sup> 2-Anthramine (1.25 mg per plate) – positive control in the presence of S9 for TA97a, TA98, and TA100. <sup>f</sup> 2-Aminofluorene (10.0 mg per plate) – positive control in the presence of S9 for TA102.

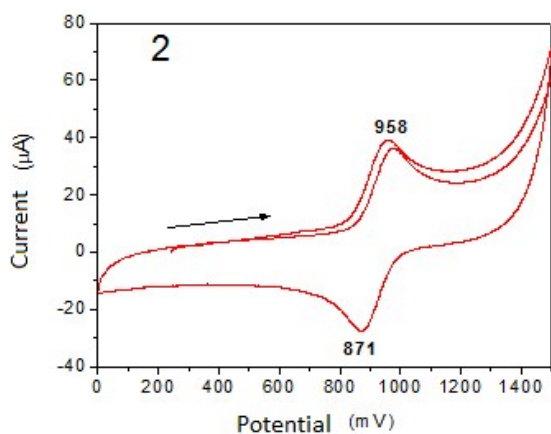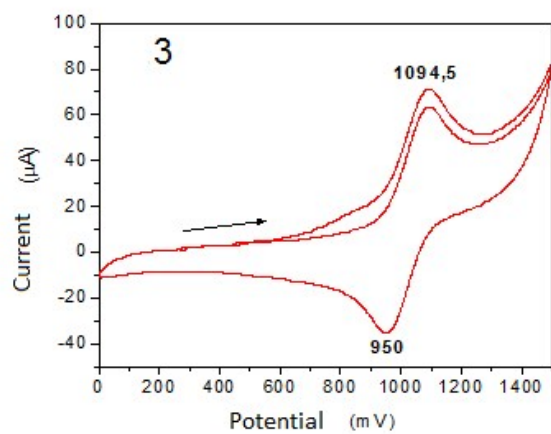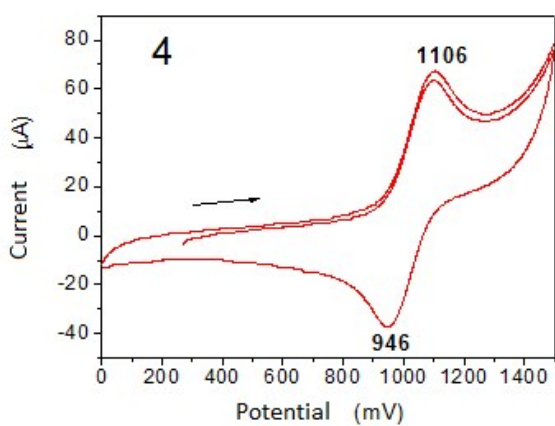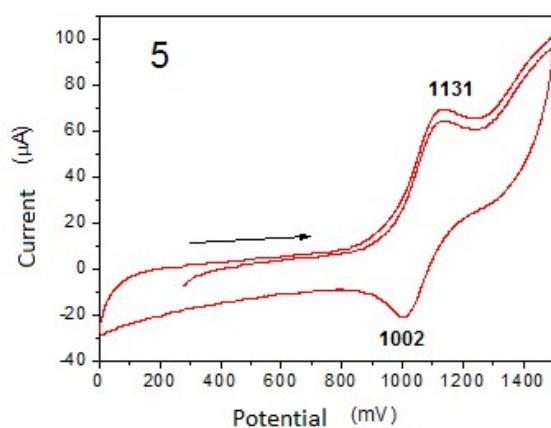

Figure 1S. Cyclic voltammograms of complexes 2-5 in  $\text{CH}_2\text{Cl}_2$ , scan rate 100 mV/s.

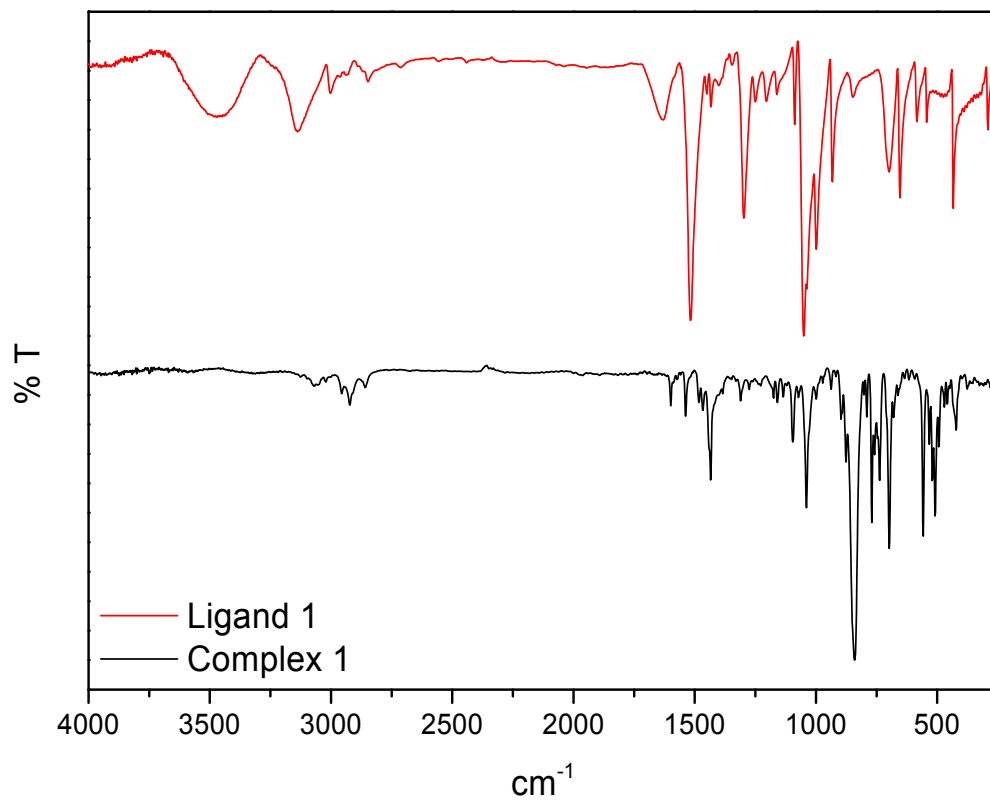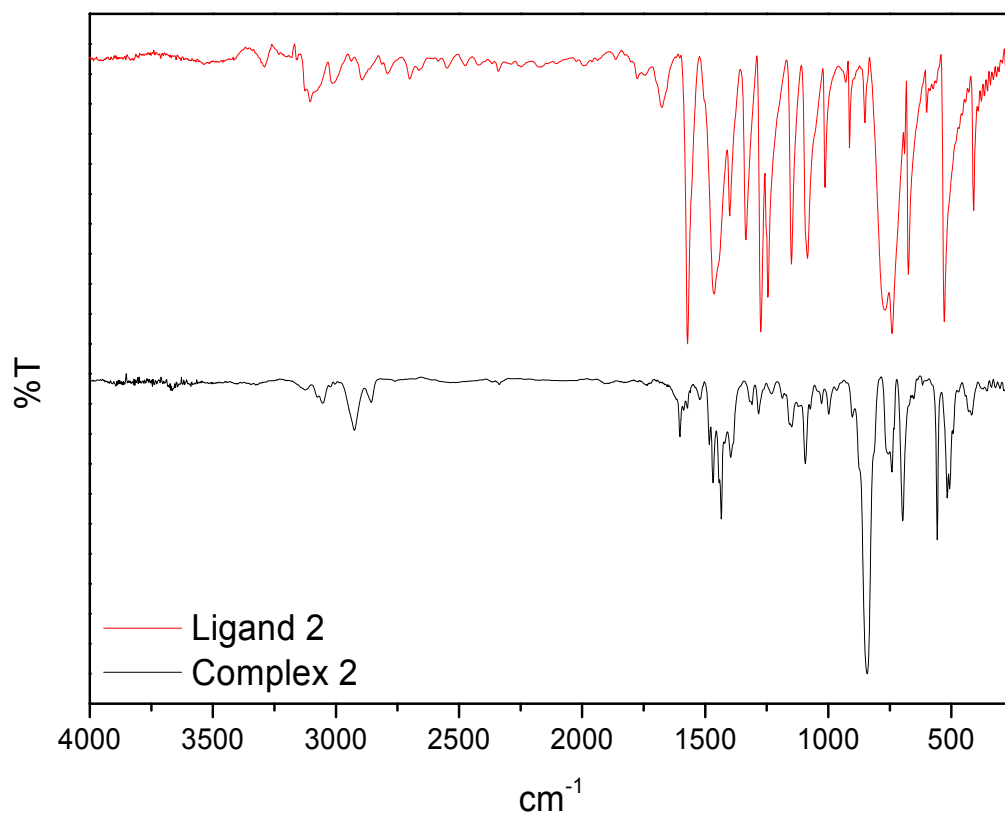

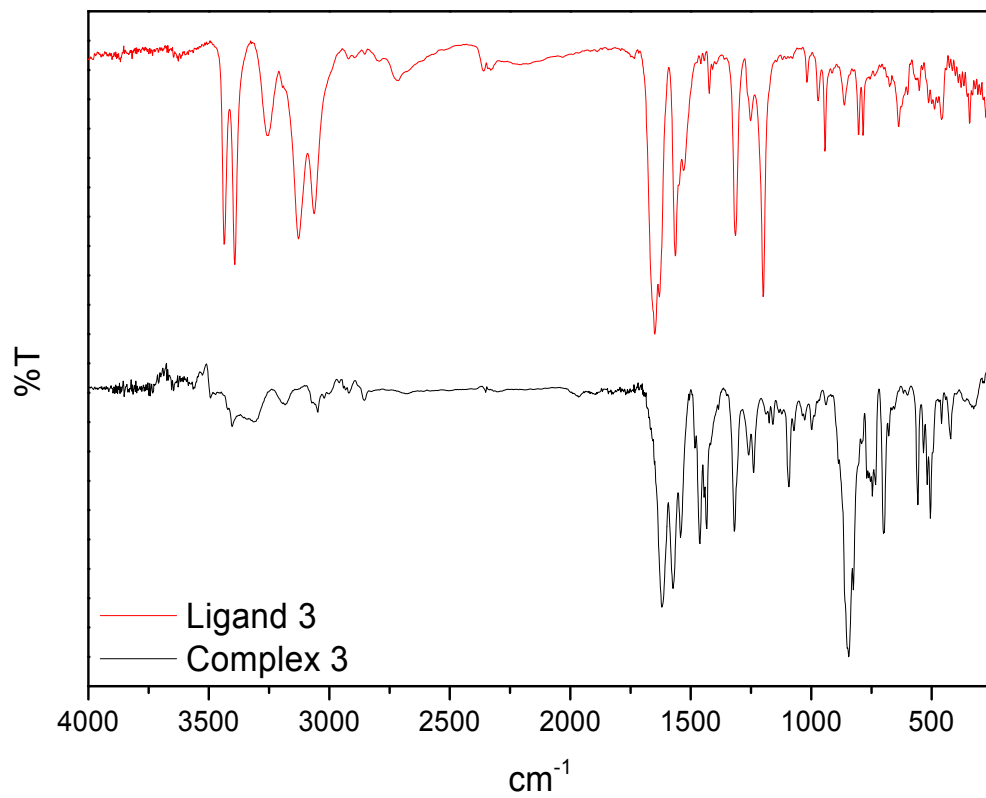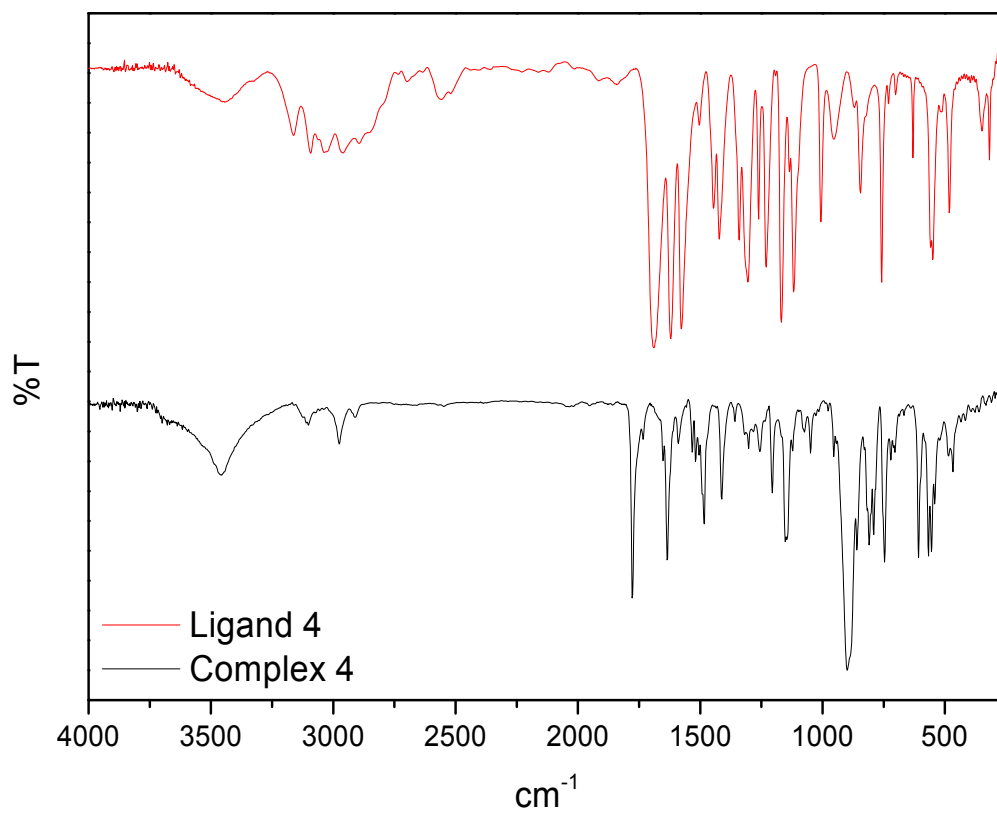

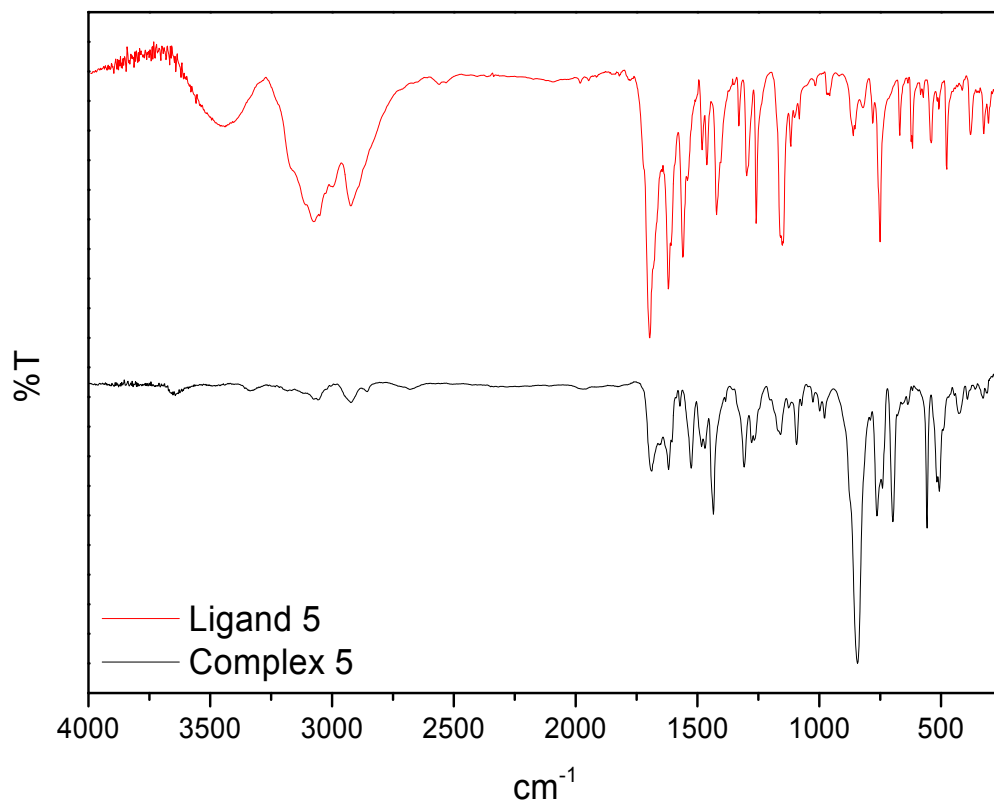

Figure 2S. FT-Infrared spectra of the ligands (1-5) and complexes 1-5

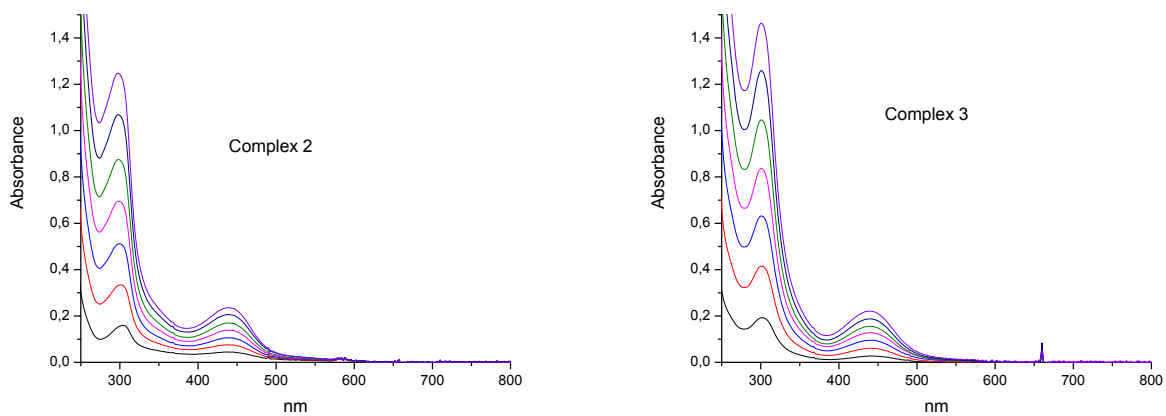



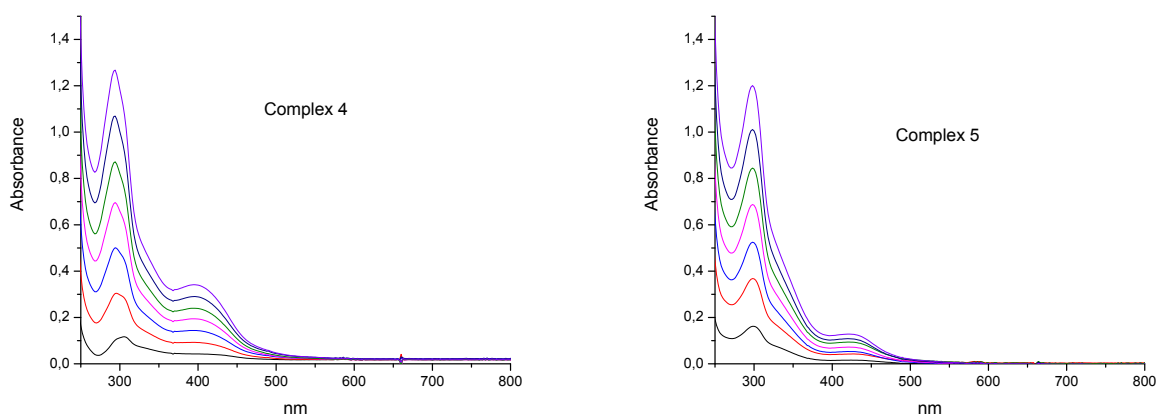

Figure 3S. Uv/Vis spectra of complexes 2-5, in  $\text{CHCl}_2$ .

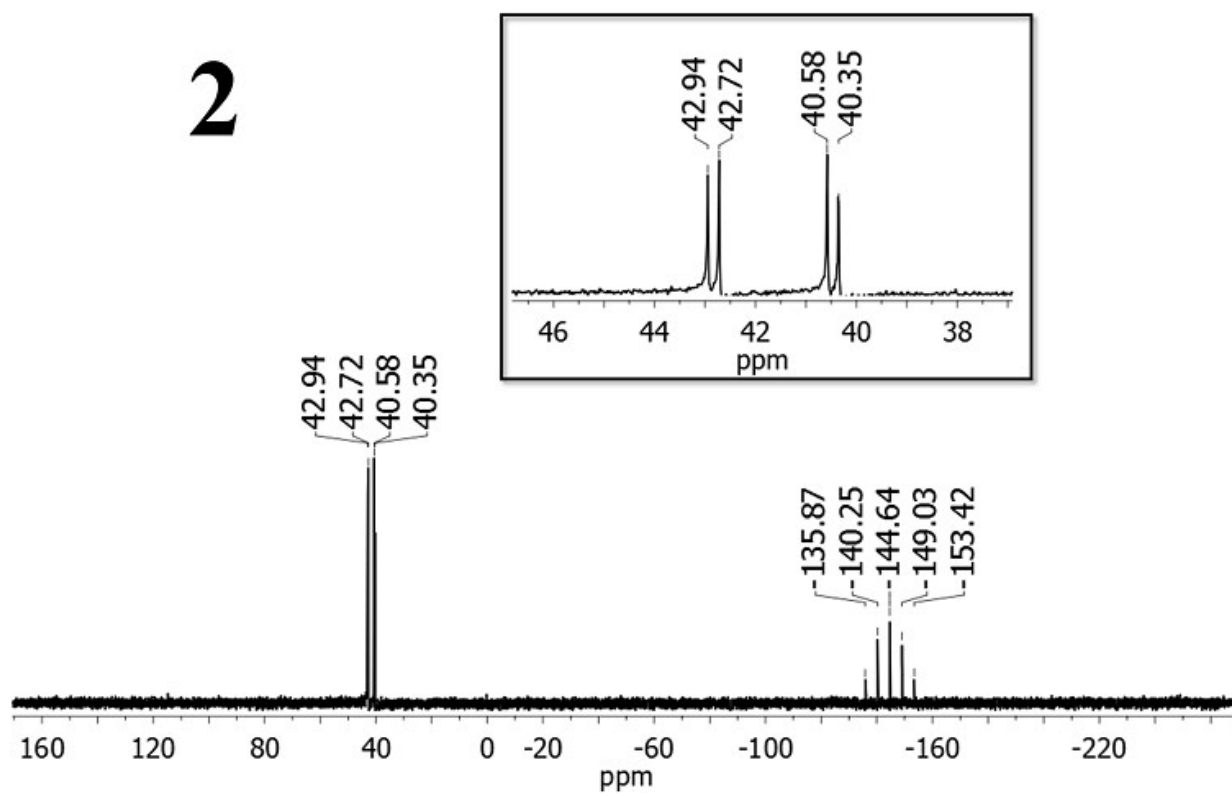

# 3

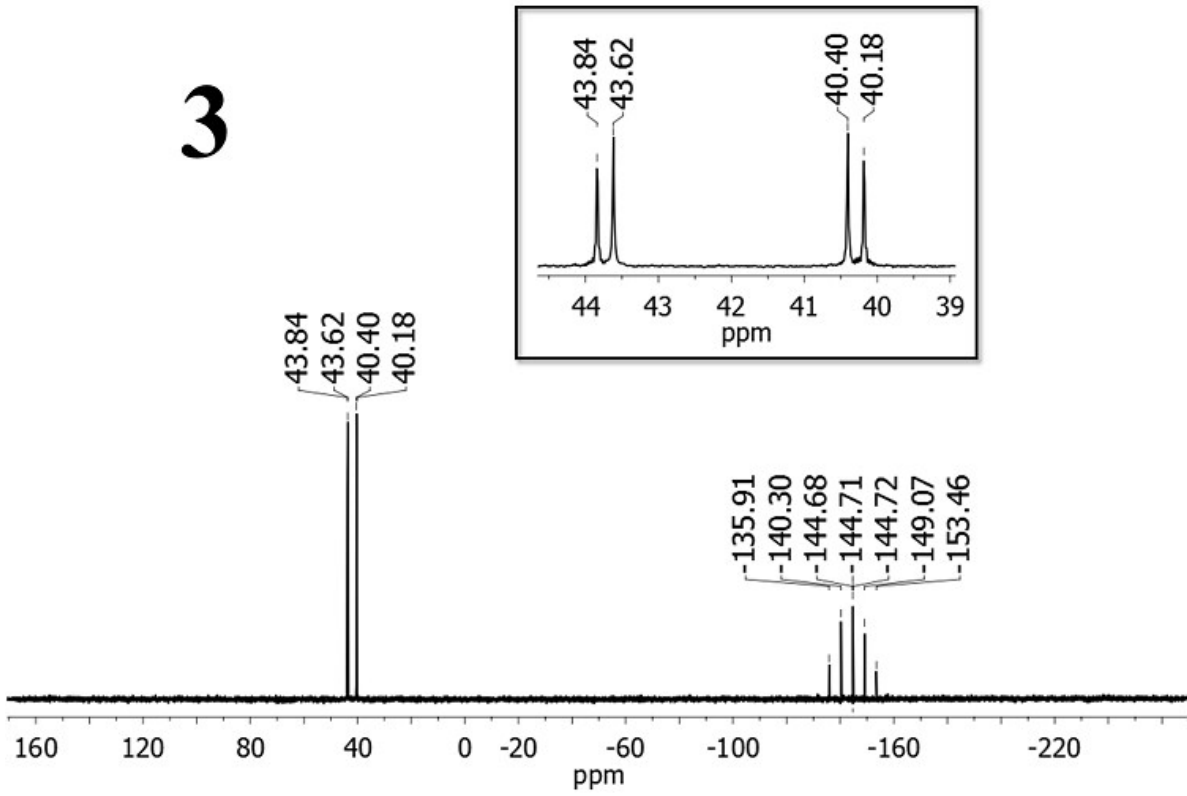

# 4

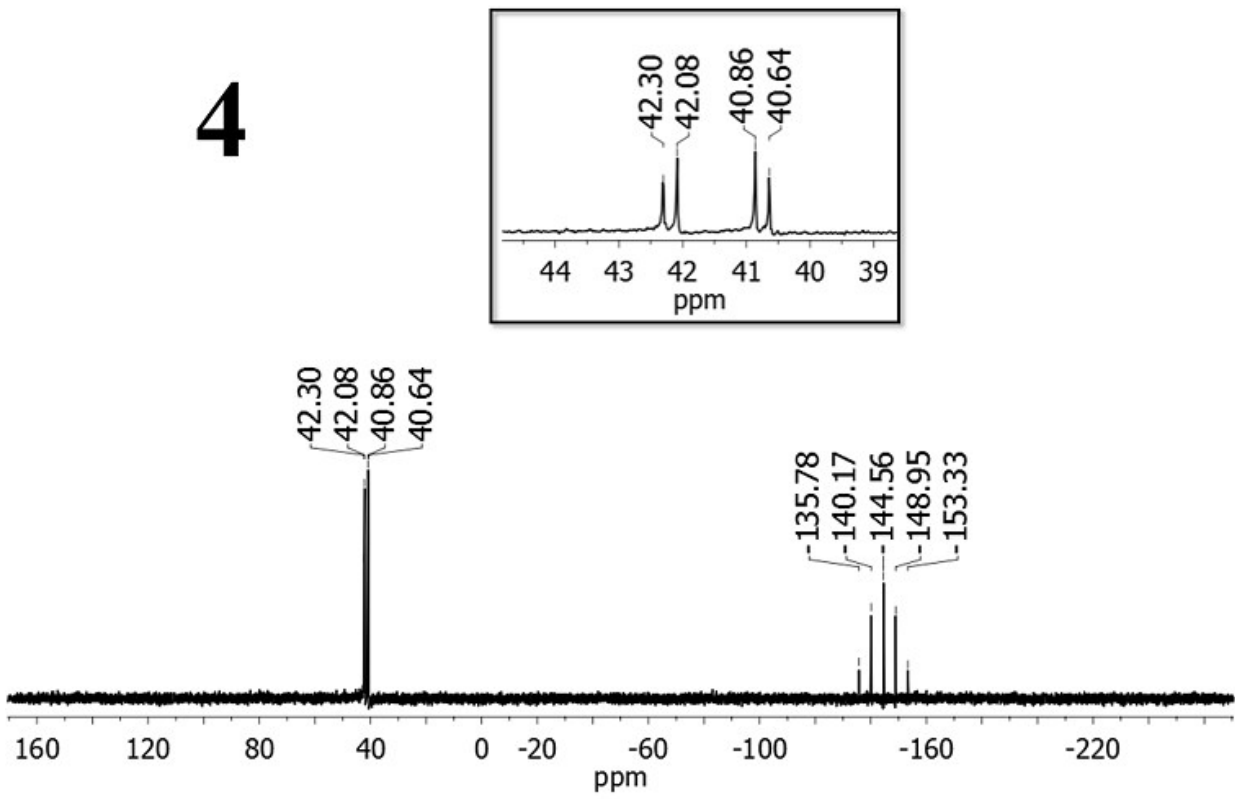

# 5

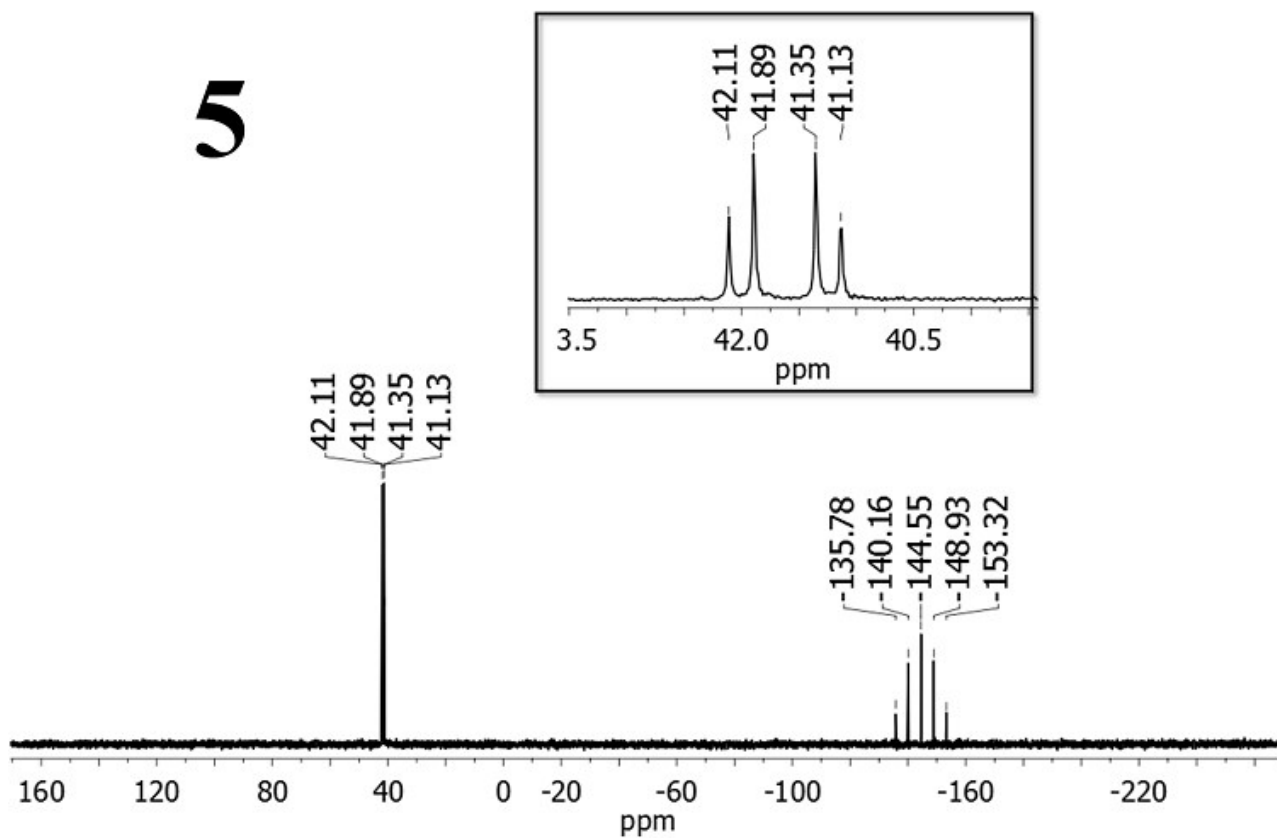

Figure 4S.  $^{31}\text{P}\{^1\text{H}\}$  NMR spectra for complexes 2-5 in  $\text{CH}_2\text{Cl}_2/\text{D}_2\text{O}$ .

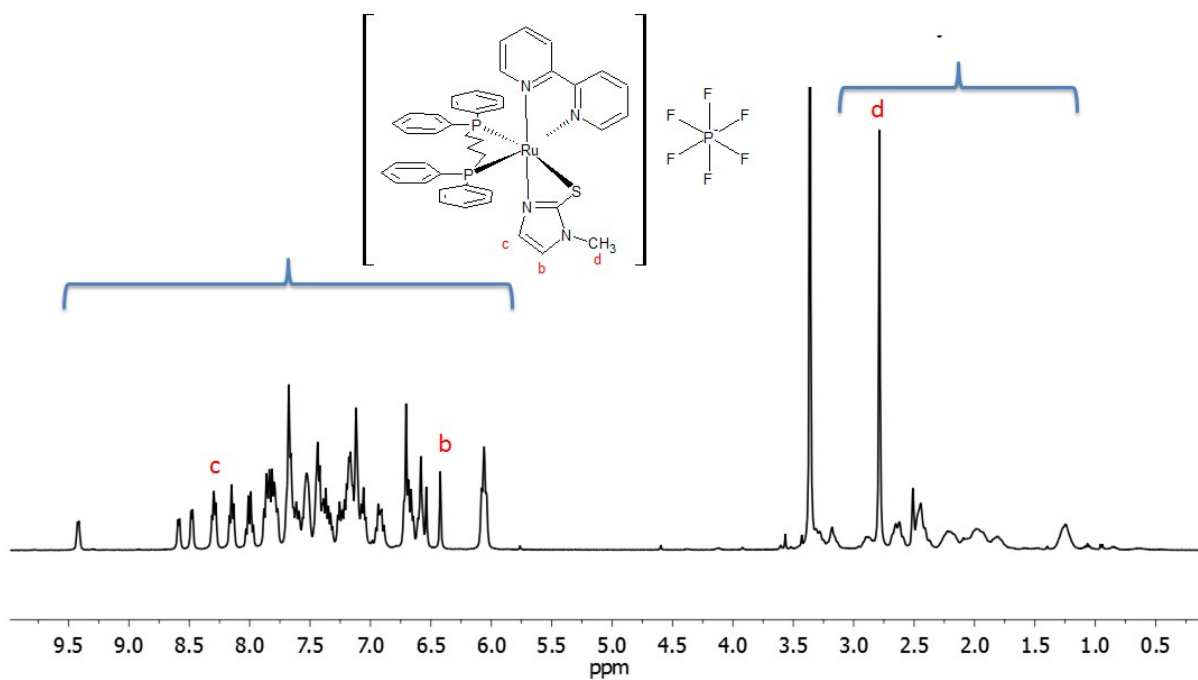

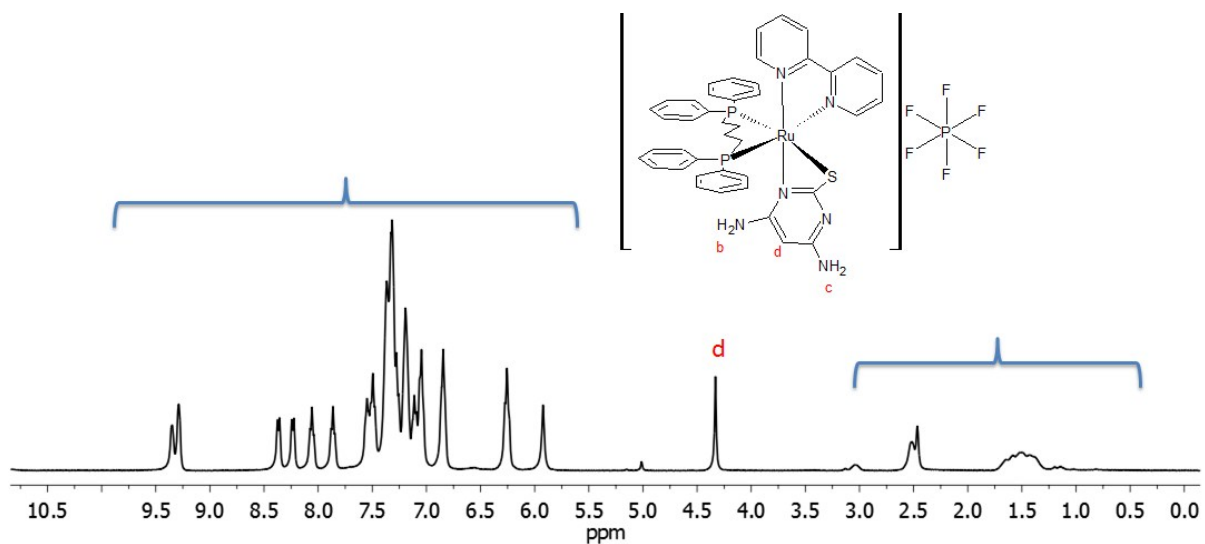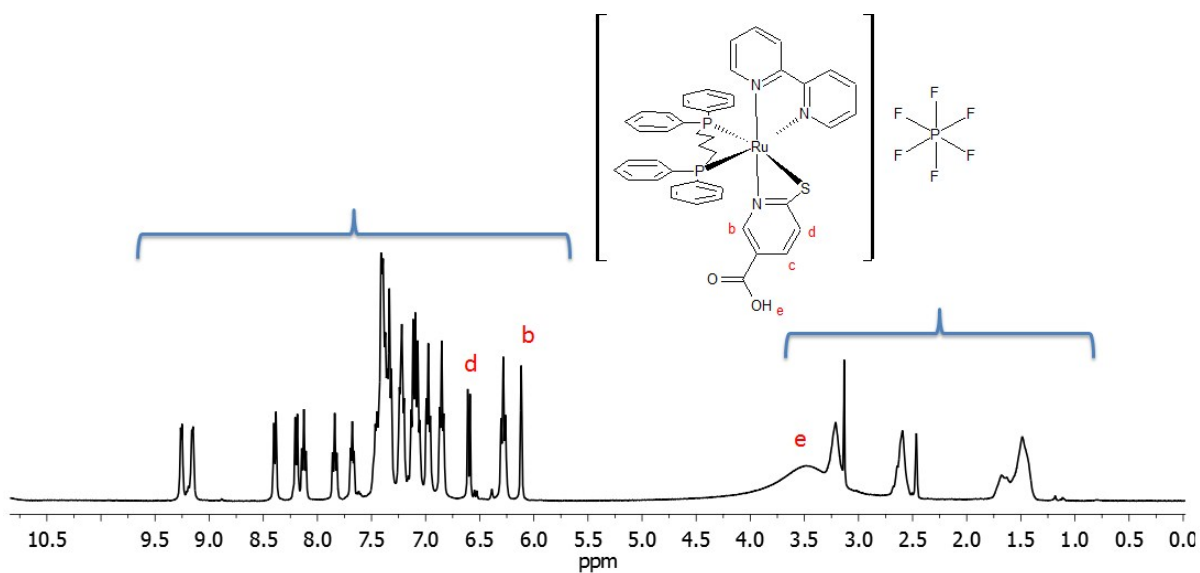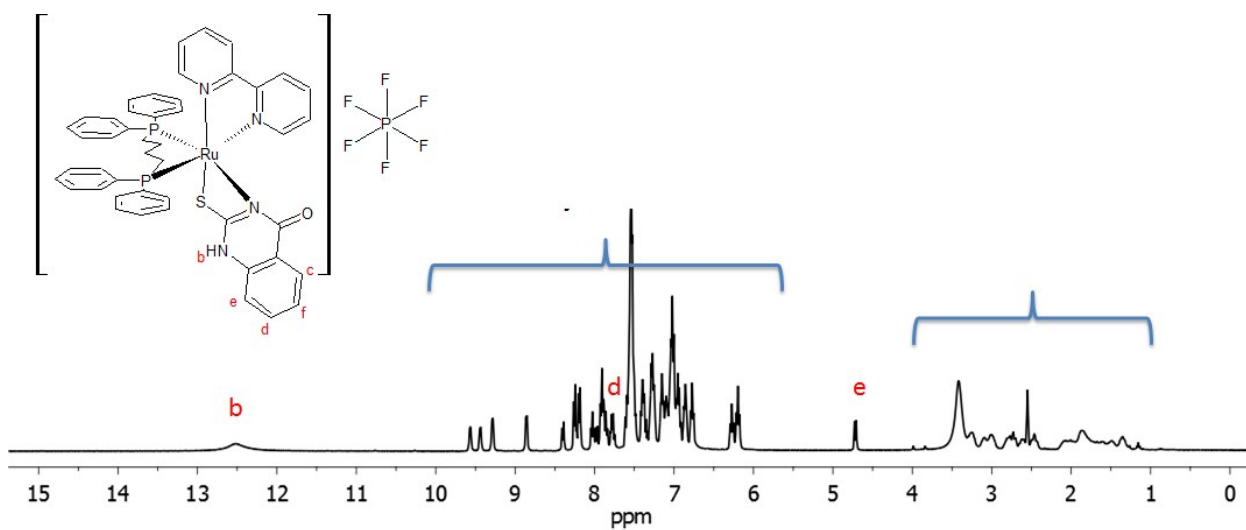

Figure S5:  $\{^1\text{H}\}$  NMR spectra for complexes 2-5 in  $\text{DMSO-d}_6$

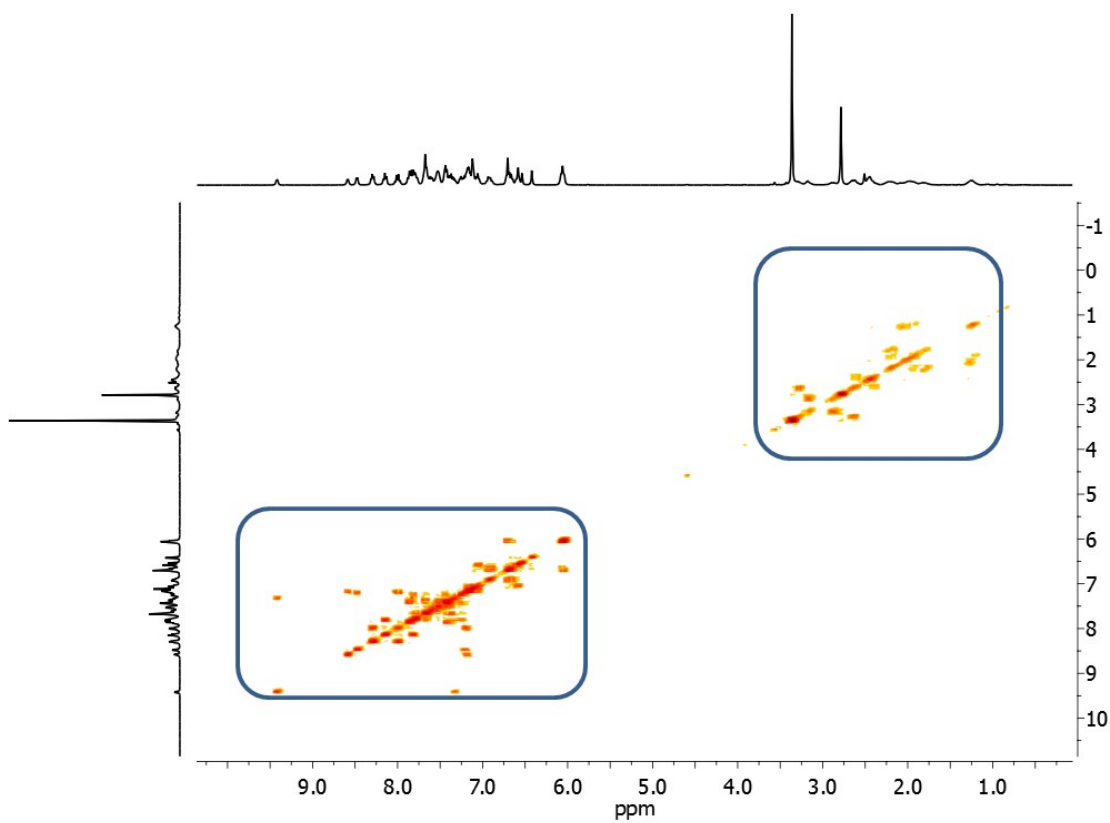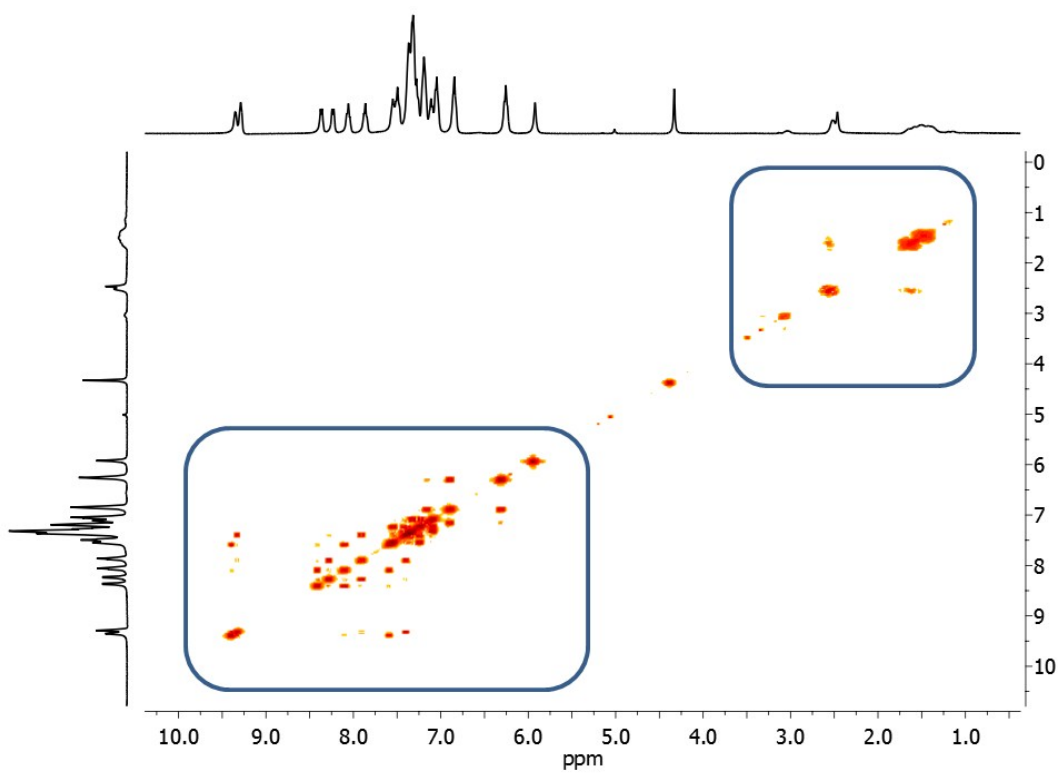

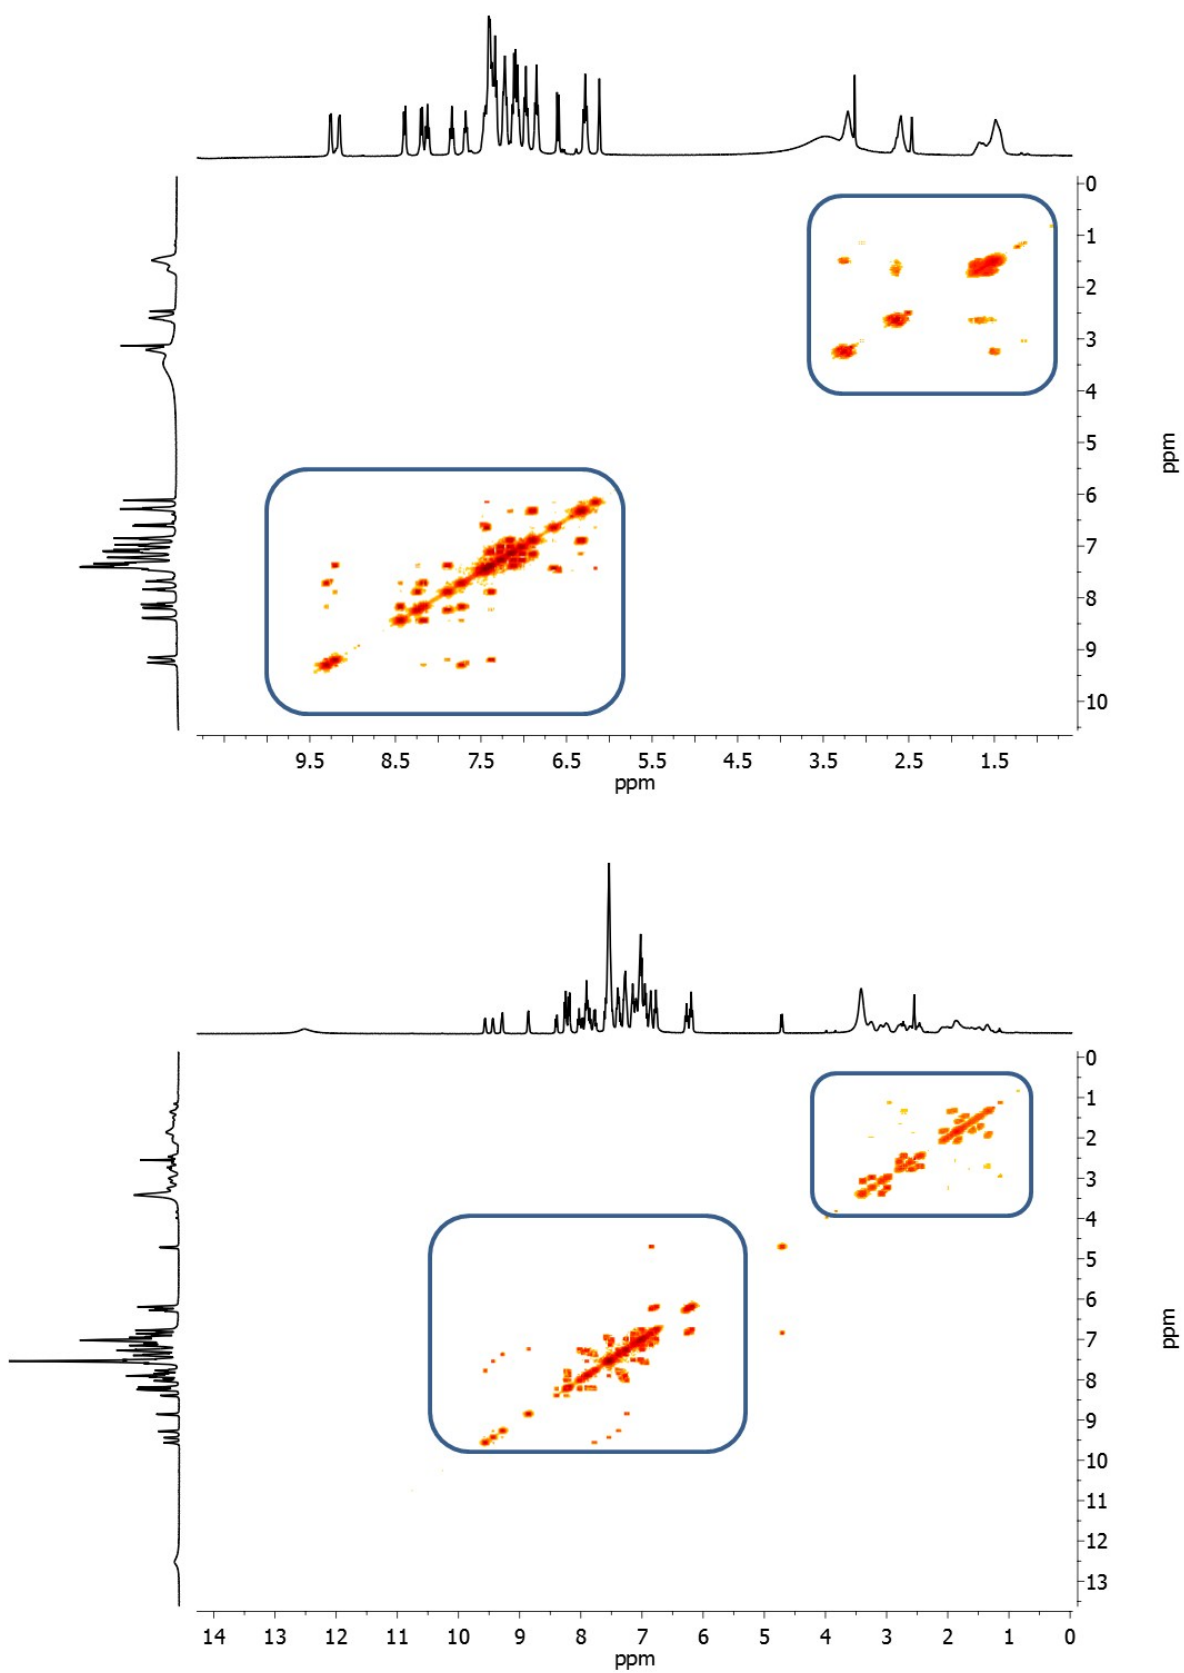

Figure 6S: COSY (<sup>1</sup>H-<sup>1</sup>H) NMR spectra for complexes 2-5 in DMSO-d<sub>6</sub>

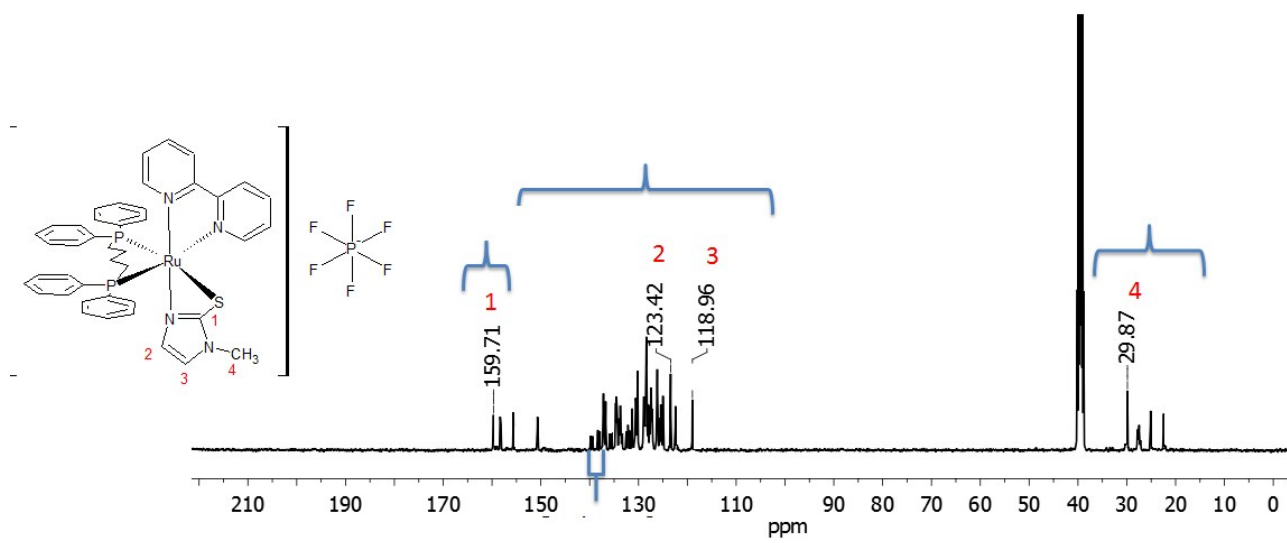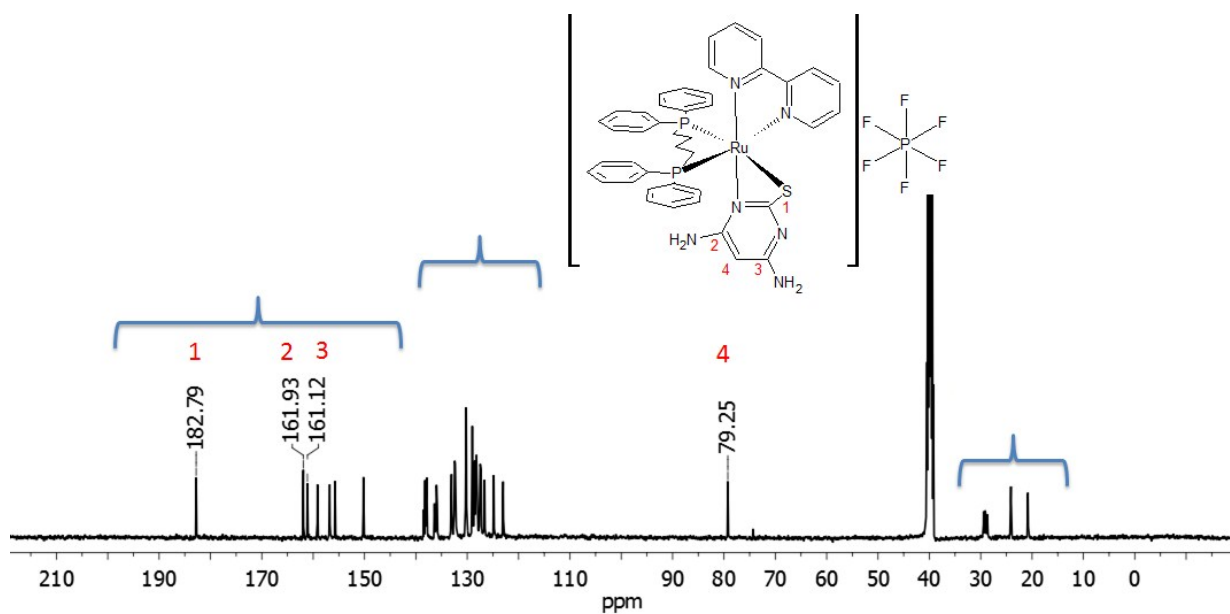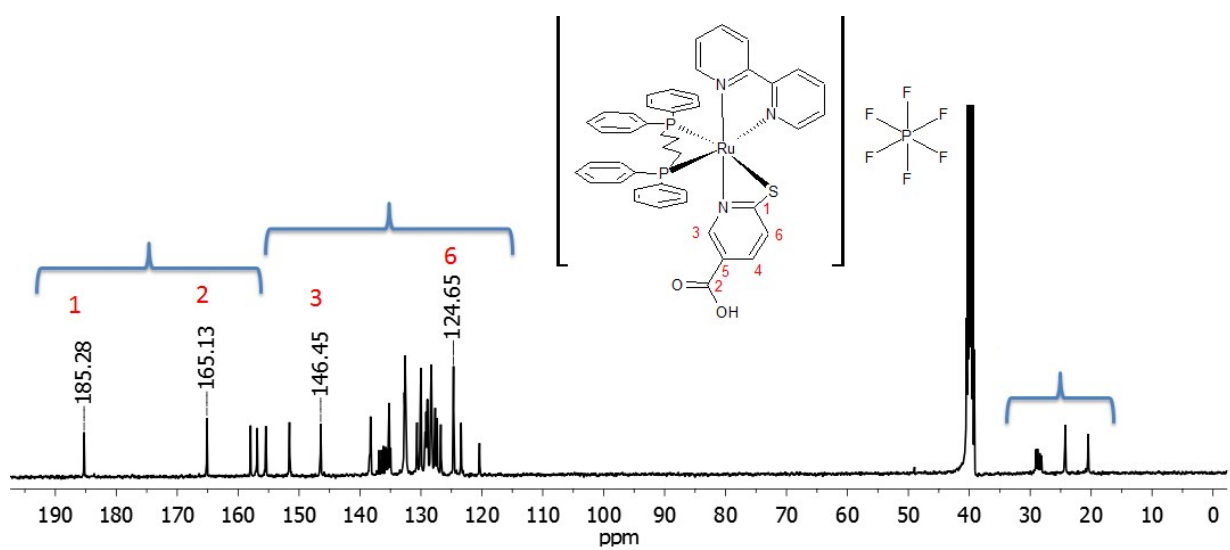

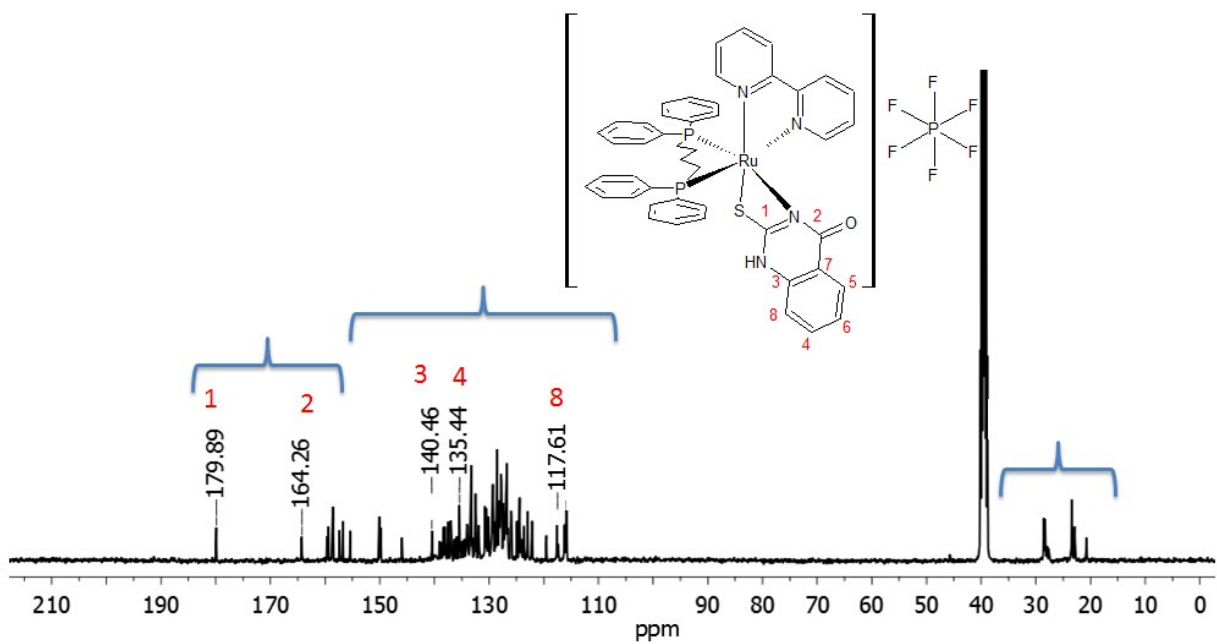

Figure 7S:  $^{13}\text{C}\{^1\text{H}\}$  NMR spectra for complexes 2-5 in  $\text{DMSO-d}_6$

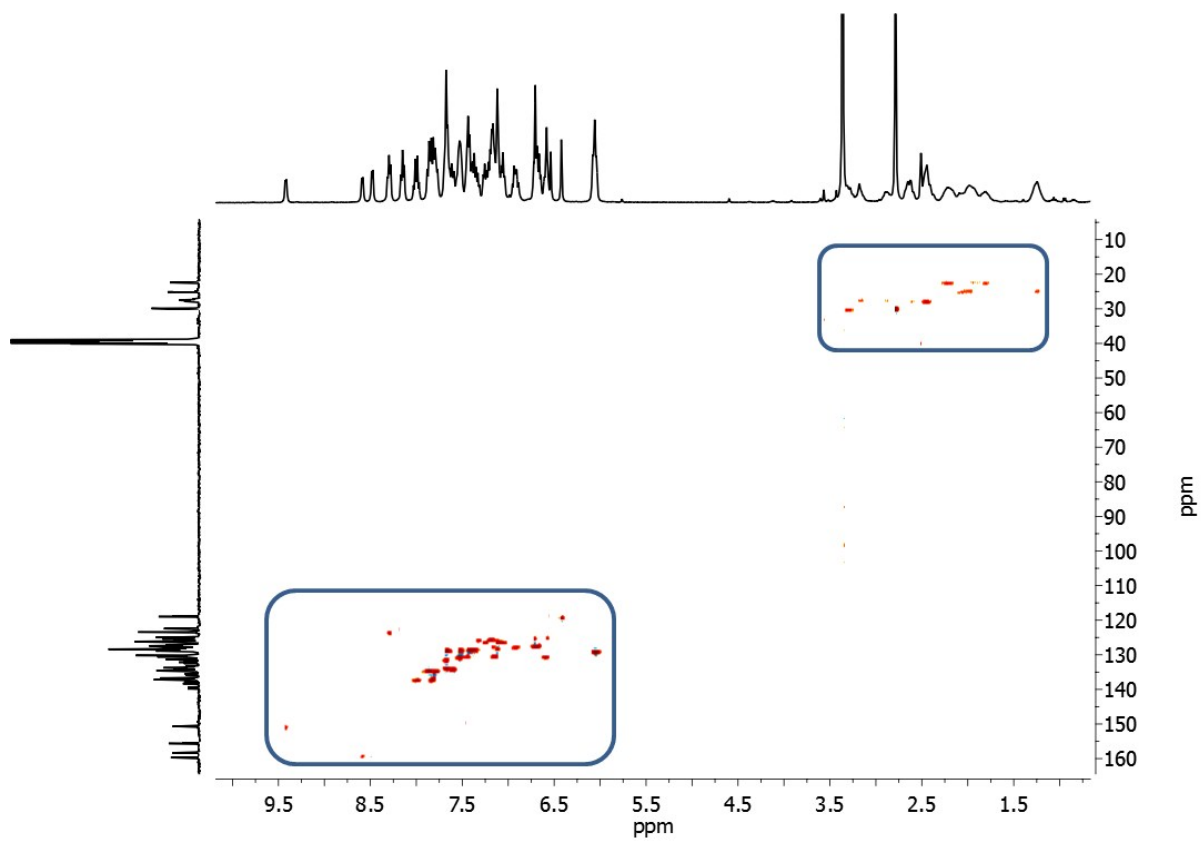



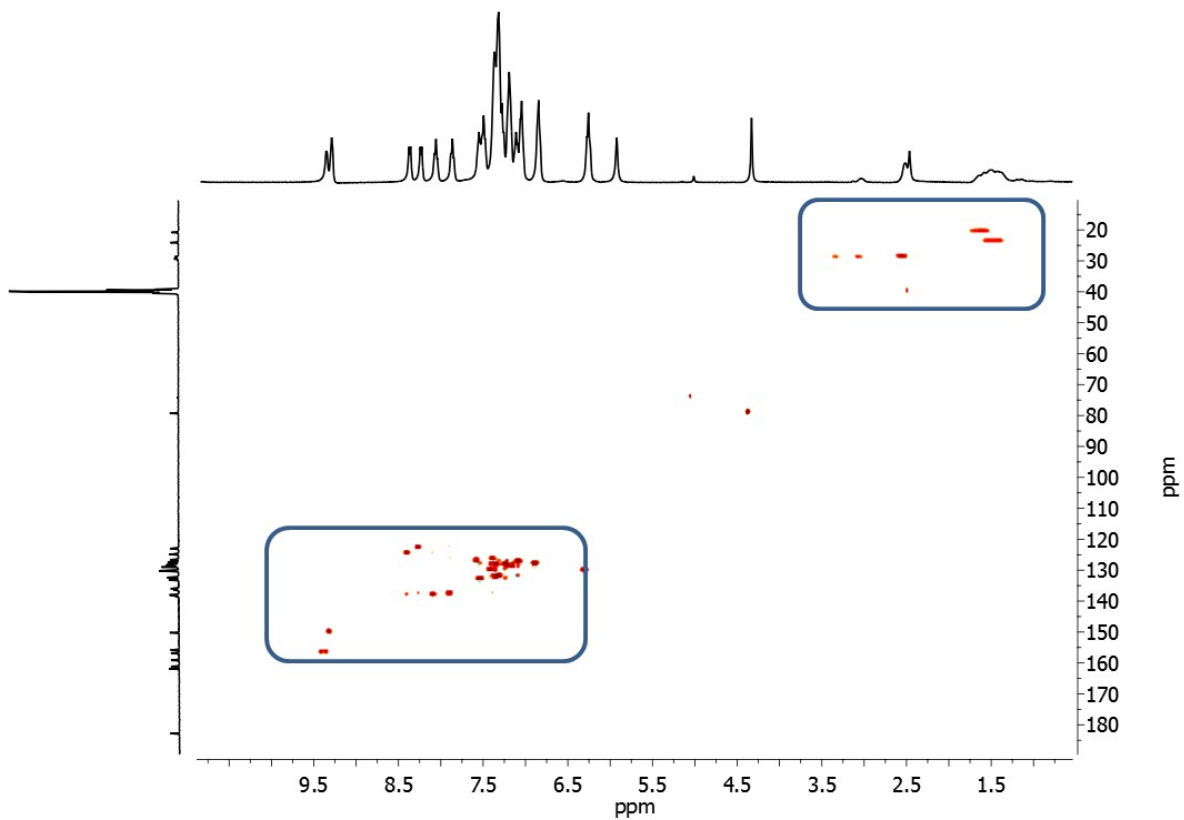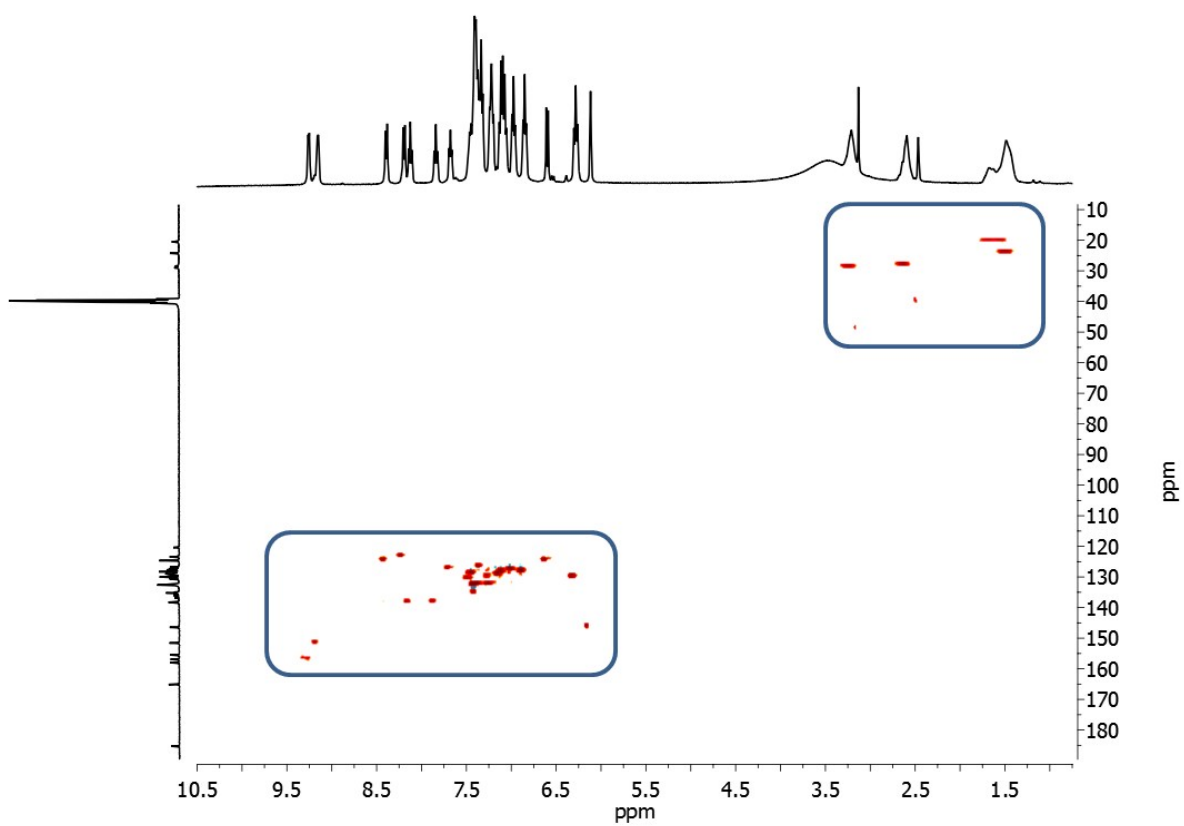

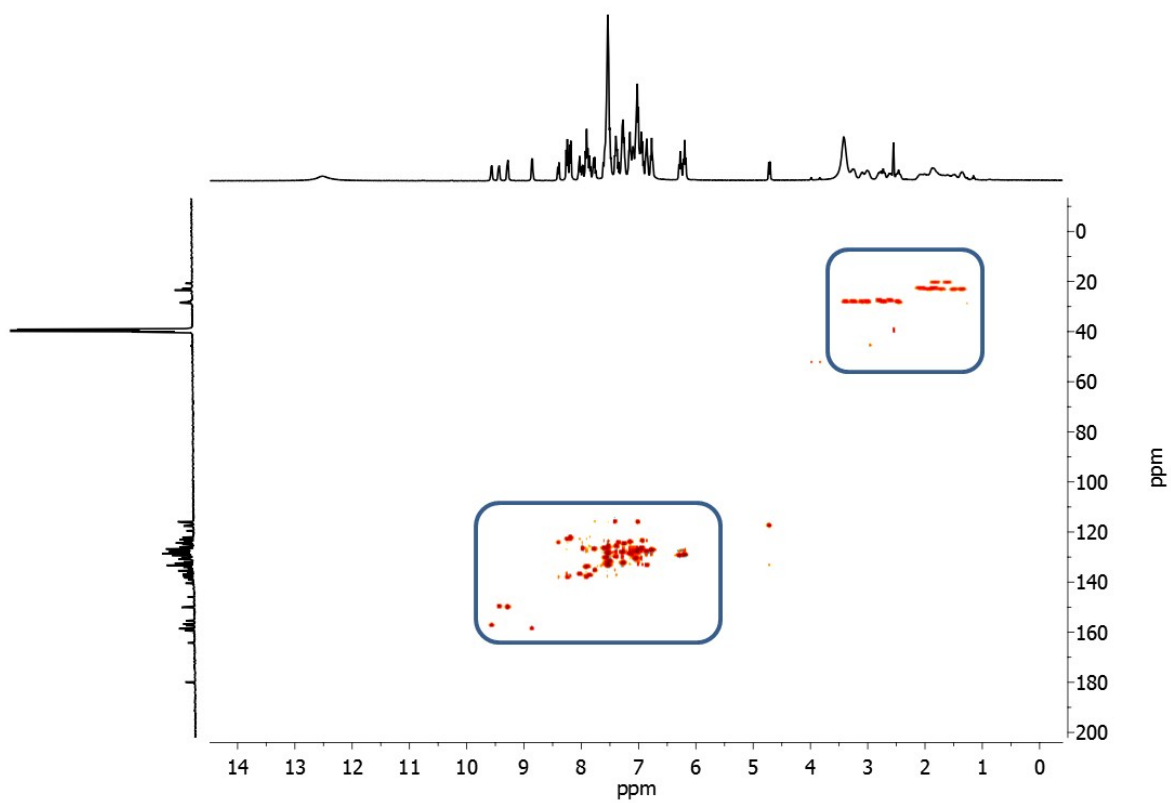

Figure 8S: HSQC ( $^1\text{H}$ - $^{13}\text{C}$ ) NMR spectra for complexes 2-5 in  $\text{DMSO-d}_6$

(A)

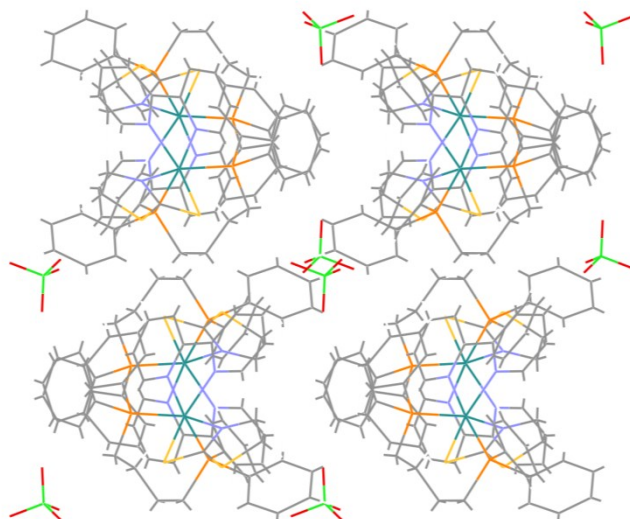

(B)

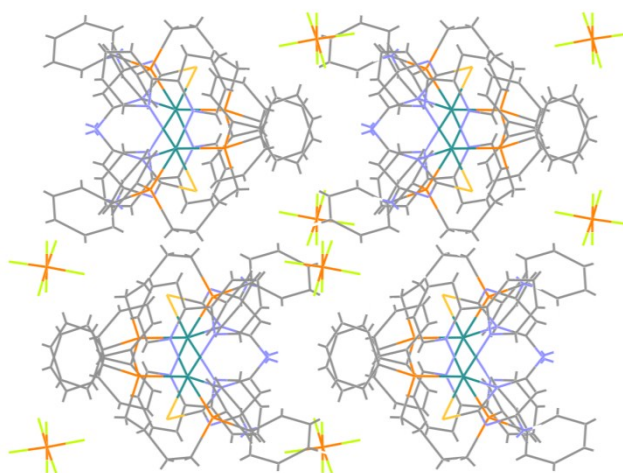

Figure 9S. Representation of the crystal packing of the complex 1. $\text{ClO}_4$  (A) and the complex 3 (B), showing the same supramolecular pattern.

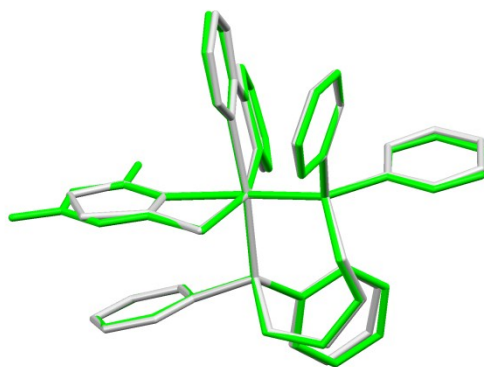

Overlap of 1 (light gray) and 3 (green).

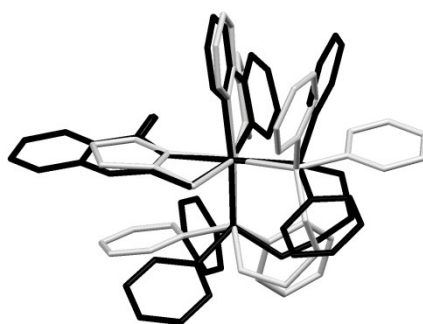

Overlap of 1 (light gray) and 5 (black).

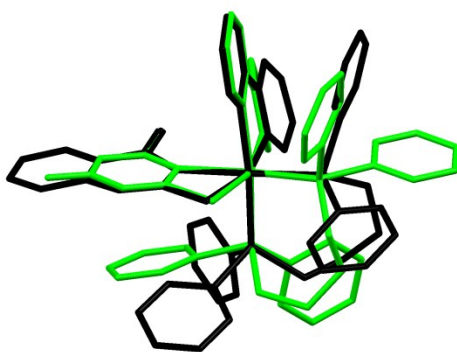

Overlap of 3 (green) and 5 (black).

Figure 10S. Overlap between the molecules of the complexes 3 and 5.

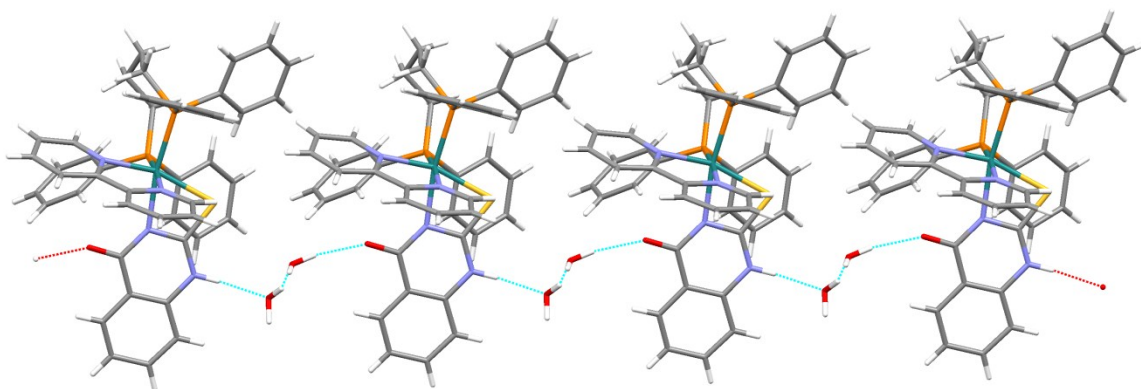

Figure 11S. H-bonding of 5 along *a*-axis.

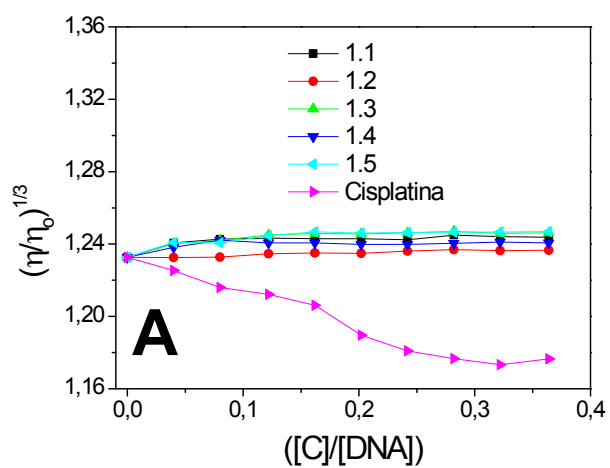

Figure 12S: Viscosity of *ct*-DNA  $(\eta/\eta_0)^{1/3}$ , increasing complexes 1–5 concentrations. Experiments were carried out at 298 K, in a Tris-HCl buffer, pH 7.4.

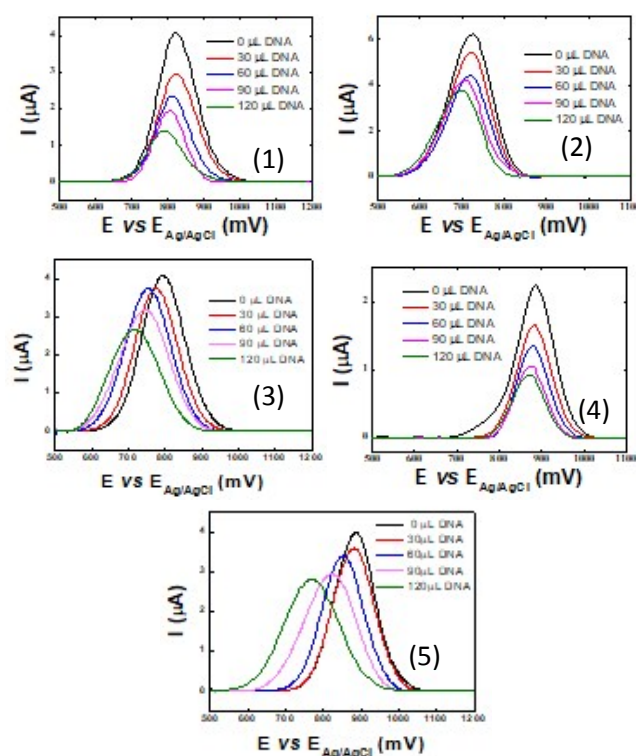

Figure 13S. Square-wave voltammogram of 1.0 mM of complexes 1-5 at the GC electrode in Tris-HCl buffer (pH 7.4), 30% DMSO, was used as a supporting electrolyte, *ct*-DNA 4.2  $\mu$ M. Frequency = 50 Hz, pulse height = 75 mV and potential increment = 2 mV.

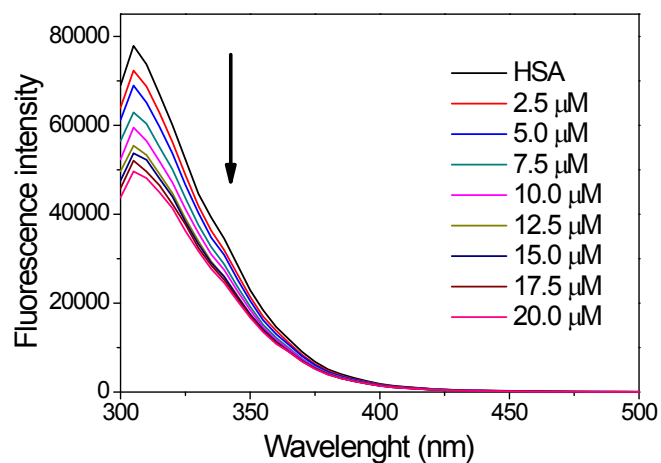

Figure 14S . Fluorescence quenching spectra of HAS, at different concentration of complex 1 with the excitation wavelength at 305 nm, at 310 K, in a Trizma buffer, pH 7.4.
